# Supplementary material
Source: publisher figshare collection journal article supplement (https://acs.figshare.com/ndownloader/files/15030188)

## Supporting Information for

### Structural and Functional Studies of the Membrane Binding Domain of NADPH - Cytochrome P450 Oxidoreductase

Chuanwu Xia<sup>1\*</sup>, Anna L. Shen<sup>2\*</sup>, Panida Duangkaew<sup>1,3,5</sup>, Rattanawadee Kotewong<sup>1,3</sup>, Pornpimol Rongnoparut<sup>3</sup>, Jimmy Feix<sup>4</sup>, and Jung-Ja P. Kim<sup>1</sup>

From <sup>1</sup>Department of Biochemistry, Medical College of Wisconsin, Milwaukee, Wisconsin 53226;

<sup>2</sup>McArdle Laboratory for Cancer Research, University of Wisconsin, Madison, Wisconsin 53706

<sup>3</sup>Department of Biochemistry, Faculty of Science, Mahidol University, Bangkok, Thailand

<sup>4</sup>Department of Biophysics, Medical College of Wisconsin, Milwaukee, Wisconsin 53226

<sup>5</sup>Present address: Faculty of Animal Sciences and Agricultural Technology, Silpakorn University, Cha-am, Phetchaburi 76120 Thailand.

Corresponding Author: Jung-Ja P. Kim, Department of Biochemistry, Medical College of Wisconsin  
jjkim@mcw.edu

Figure S1. Absorbance Spectra of oxidized (black) and NADPH reduced (red) forms of Cys-less CYPOR (CYPOR\*). The Absorbance Spectrum of CYPOR\* was recorded at one minute after addition of 50  $\mu$ M (final concentration) of NADPH. The semiquinone formation was indicated by the appearance of the new broad peak at 585 nm in the reduced form. Thus, there is no gross effect of the seven cysteine substitutions on the FMN- and FAD-binding to the polypeptide and electron transfer from NADPH to the flavins.

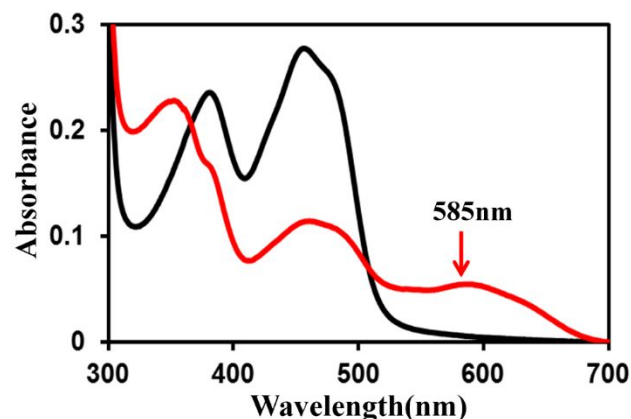

Supplement: Supplementary file 1 [file 15030188]
